# Supplementary material
Source: MDPI journal article supplement (https://www.mdpi.com/2077-0472/13/1/6)
Supplement: s1 [file s1]

Archive with 2 entries (2 files):
- Tomato salt stress SD Figure S1.pdf
- Tomato salt stress SD Figure S2.pdf
